# Supplementary material for: Inflation using hydrogen improves donor lung quality by regulating mitochondrial function during cold ischemia phase
Source: Springer Nature journal article supplement (doi:10.1186/s12890-023-02504-6), 2023-06-17
Supplement: 12890_2023_2504_MOESM1_ESM.pdf [file 12890_2023_2504_MOESM1_ESM.pdf]

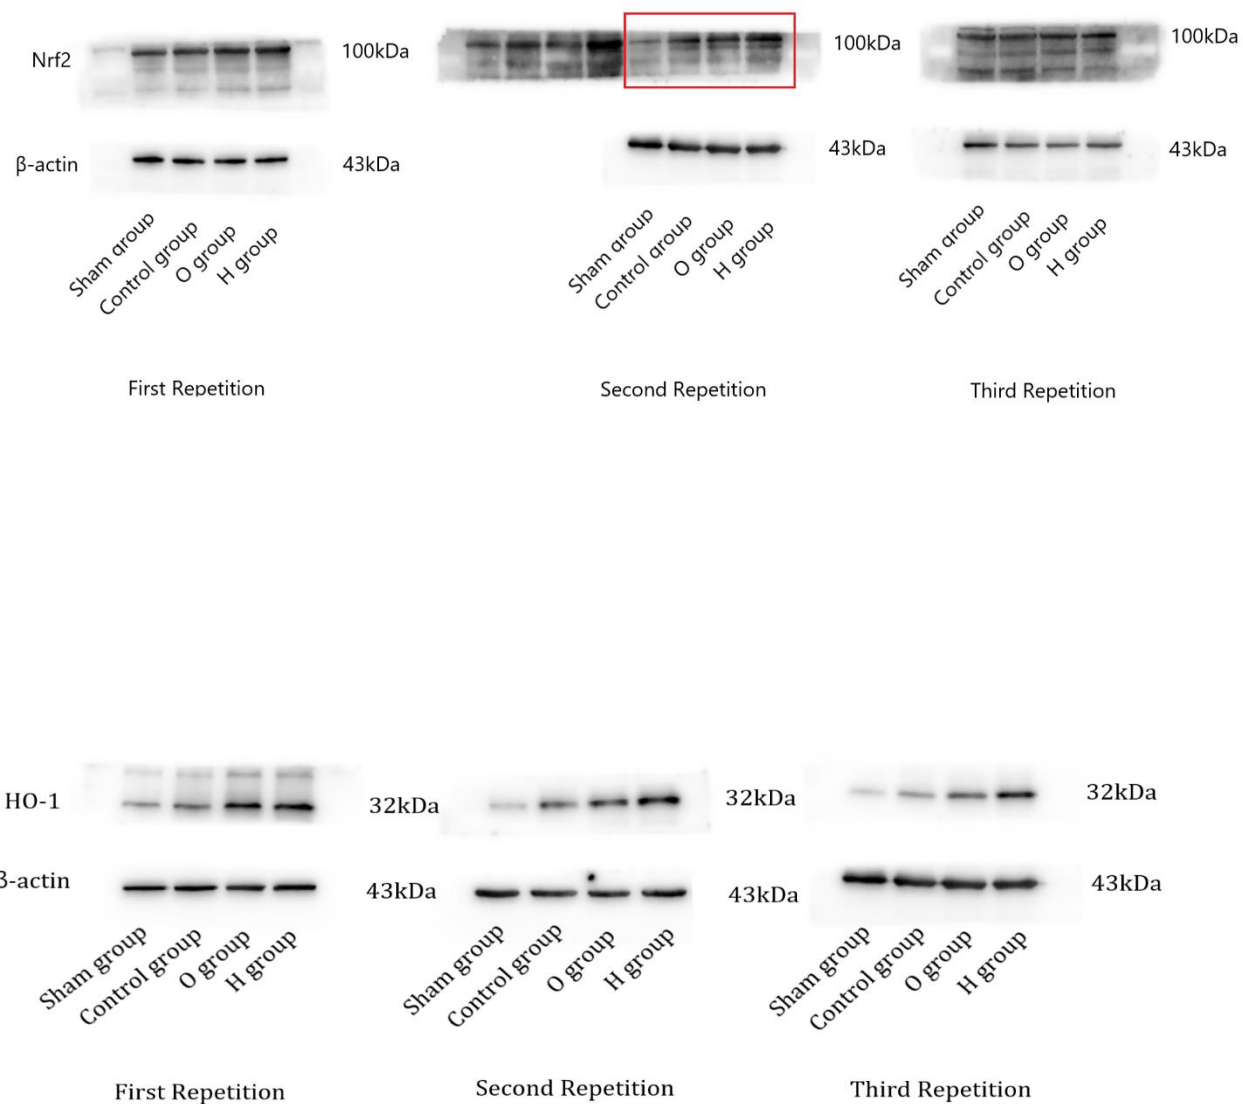

Fig S1. Original Western blot images of Fig 5A. The blots were cut prior to hybridization with antibodies. The images show all blots and replicates of Nrf2, HO-1,  $\beta$ -actin. Nrf2, nuclear factor erythroid 2-related factor 2; HO-1, heme oxygenase-1.
